# Supplementary material for: Brassinosteroids Induce Strong, Dose-Dependent Inhibition of Etiolated Pea Seedling Growth Correlated with Ethylene Production
Source: PubMed Central journal article supplement (PMC7017382; doi:10.3390/biom9120849), 2019-12-09
Supplement: biomolecules-09-00849-s001.pdf [file biomolecules-09-00849-s001.pdf]

**Supplementary data**

**BRASSINOSTEROIDS INDUCE STRONG, DOSE-DEPENDENT INHIBITION OF ETIOLATED PEA SEEDLING GROWTH CORRELATED WITH ETHYLENE PRODUCTION**

Petra Jiroutová, Jaromír Mikulík, Ondřej Novák, Miroslav Strnad and Jana Oklestkova\*

*Laboratory of Growth Regulators, The Czech Academy of Sciences, Institute of Experimental Botany & Palacký University, Faculty of Science, Šlechtitelů 27, 78371 Olomouc, Czech Republic.*

*\*Corresponding author: E-mail address: [jana.oklestkova@upol.cz](mailto:jana.oklestkova@upol.cz), Tel. +420585634853 (J. Oklestkova)*

**SuppTable1** statistical data for Fig. 4 – length of epicotyls after treatment, \*represents p value <0.05, \*\*represent p value <0.01, \*\*\*represent p value <0.001.

| ttest   | compound | c [mol/L] | p value      | ttest | compound | c [mol/L] | p value      |
|---------|----------|-----------|--------------|-------|----------|-----------|--------------|
| BL      |          | 2,00E-09  | 0,51911 -    | IAA   |          | 2,00E-09  | 0,360875 -   |
|         |          | 2,00E-08  | 0,522542 -   |       |          | 2,00E-08  | 0,747311 -   |
|         |          | 2,00E-07  | 0,325809 -   |       |          | 2,00E-07  | 0,161763 -   |
|         |          | 2,00E-06  | 0,002028 **  |       |          | 2,00E-06  | 0,414765 -   |
|         |          | 2,00E-05  | 2,54E-05 *** |       |          | 2,00E-05  | 0,918297 -   |
|         |          | 2,00E-04  | 1,64E-09 *** |       |          | 2,00E-04  | 0,001709 **  |
|         |          | 2,00E-03  | 4,96E-10 *** |       |          | 2,00E-03  | 2,25E-06 *** |
|         |          | 2,00E-02  | 3,35E-10 *** |       |          | 2,00E-02  | 3,82E-10 *** |
| 24epiBL |          | 2,00E-09  | 0,087668 -   | GA3   |          | 2,00E-09  | 0,695175 -   |
|         |          | 2,00E-08  | 0,084818 -   |       |          | 2,00E-08  | 0,017927 *   |
|         |          | 2,00E-07  | 0,829234 -   |       |          | 2,00E-07  | 0,009965 **  |
|         |          | 2,00E-06  | 0,526198 -   |       |          | 2,00E-06  | 0,015807 *   |
|         |          | 2,00E-05  | 6,07E-09 *** |       |          | 2,00E-05  | 0,00052 ***  |
|         |          | 2,00E-04  | 3,46E-09 *** |       |          | 2,00E-04  | 0,000427 *** |
|         |          | 2,00E-03  | 3,88E-11 *** |       |          | 2,00E-03  | 0,000324 *** |
|         |          | 2,00E-02  | 5,02E-12 *** |       |          | 2,00E-02  | 0,001915 **  |
| tZR     |          | 2,00E-09  | 0,318369 -   | TDZ   |          | 2,00E-09  | 0,571013 -   |
|         |          | 2,00E-08  | 0,449671 -   |       |          | 2,00E-08  | 0,009998 **  |
|         |          | 2,00E-07  | 0,847271 -   |       |          | 2,00E-07  | 0,856863 -   |
|         |          | 2,00E-06  | 0,6008 -     |       |          | 2,00E-06  | 0,000577 *** |
|         |          | 2,00E-05  | 0,229864 -   |       |          | 2,00E-05  | 0,069406 -   |
|         |          | 2,00E-04  | 0,929079 -   |       |          | 2,00E-04  | 0,07741 -    |
|         |          | 2,00E-03  | 0,365523 -   |       |          | 2,00E-03  | 3,88E-06 *** |
|         |          | 2,00E-02  | 0,04463 *    |       |          | 2,00E-02  | 8,11E-07 *** |
